# Supplementary material
Source: PubMed Central journal article supplement (PMC3008363)
Supplement: legend.pdf [file legend.pdf]

***Fig. 1S. Networks (1 and 2) created by Ingenuity Pathway Analysis from genes exhibiting significant genotype and angiotensin II treatment interactions.***

Square=cytokine; vertical oval=transmembrane receptor; rectangle=nuclear receptor; diamond=enzyme; rhomboid=transporter; hexagon=translation factor; horizontal oval=transcription factor; circle=others. A line indicates gene products that bind one another. A line with arrow indicates that a gene products is acting on another.
