# Supplementary material
Source: PubMed Central journal article supplement (PMC3008363)
Supplement: tables.pdf [file tables.pdf]

- 1 Table S1. *Functionally-related genes that are differentially expressed in Agtr1a<sup>-/-</sup> compared*  
 2 *wild-type mice under baseline conditions.*

| Functional Category                      | Affymetrix ID | Fold change    | Gene Symbol                                    | Description                                      |
|------------------------------------------|---------------|----------------|------------------------------------------------|--------------------------------------------------|
| <b><i>Inflammatory</i></b>               |               |                |                                                |                                                  |
| <b><i>mediators</i></b>                  | 1419209_at    | 4.145          | <i>Cxcl1</i>                                   | chemokine (C-X-C motif) ligand 1                 |
|                                          | 1418930_at    | 2.537          | <i>Cxcl10</i>                                  | chemokine (C-X-C motif) ligand 10                |
|                                          | 1418652_at    | 2.454          | <i>Cxcl9</i>                                   | chemokine (C-X-C motif) ligand 9                 |
|                                          | 1419426_s_at  | 2.33           | <i>Ccl21b</i>                                  | chemokine (C-C motif) ligand 21b                 |
|                                          |               |                | <i>Ccl21a</i>                                  | chemokine (C-C motif) ligand 21a                 |
|                                          |               |                | <i>Ccl21c</i>                                  | chemokine (C-C motif) ligand 21c<br>(leucine)    |
|                                          | 1415803_at    | 1.736          | <i>Cx3cl1</i>                                  | chemokine (C-X3-C motif) ligand 1                |
|                                          | 1417625_s_at  | 1.672          | <i>Cmkor1</i>                                  | chemokine orphan receptor 1                      |
| 1452016_at                               | 2.161         | <i>Alox5ap</i> | arachidonate 5-lipoxygenase activating protein |                                                  |
| <b><i>Histocompatibility complex</i></b> |               |                |                                                |                                                  |
| <b><i>genes</i></b>                      | 1452431_s_at  | 2.49           | <i>H2-Aa</i>                                   | Histocompatibility 2, class II antigen A, alpha  |
|                                          | 1451721_a_at  | 2.488          | <i>H2-Ab1</i>                                  | Histocompatibility 2, class II antigen A, beta 1 |
|                                          | 1417025_at    | 2.295          | <i>H2-Eb1</i>                                  | Histocompatibility 2, class II antigen E beta    |

|                               |              |       |                  |                                                                 |
|-------------------------------|--------------|-------|------------------|-----------------------------------------------------------------|
|                               | 1426324_at   | 1.613 | <i>H2-D1</i>     | Histocompatibility 2, D region locus 1                          |
|                               | 1427746_x_at | 1.579 | <i>H2-K1</i>     | Histocompatibility 2, K1, K region                              |
|                               | 1421596_s_at | 1.898 | <i>H28</i>       | Histocompatibility 28                                           |
| <b><i>Complement</i></b>      |              |       |                  |                                                                 |
| <b><i>System</i></b>          | 1423954_at   | 3.58  | <i>C3</i>        | complement component 3                                          |
|                               | 1417063_at   | 3.164 | <i>C1qb</i>      | complement component 1,<br>q subcomponent, beta polypeptide     |
|                               | 1443906_at   | 1.627 | <i>Daf1</i>      | decay accelerating factor 1                                     |
| <b><i>Immune response</i></b> |              |       |                  |                                                                 |
|                               | 1424305_at   | 11.57 | <i>Igj</i>       | immunoglobulin joining chain                                    |
|                               | 1429381_x_at | 10.49 | <i>Igh-VJ558</i> | immunoglobulin heavy chain (J558 family)                        |
|                               | 1451632_a_at | 3.135 | <i>Igh-1a</i>    | immunoglobulin heavy chain 1a (serum<br>IgG2a)                  |
|                               | 1424923_at   | 2.958 | <i>Serpina3g</i> | serine (or cysteine) peptidase inhibitor,<br>clade A, member 3G |
|                               | 1419100_at   | 2.921 | <i>Serpina3n</i> | serine (or cysteine) peptidase inhibitor,<br>clade A, member 3N |
|                               | 1448620_at   | 2.501 | <i>Fcgr3</i>     | Fc receptor, IgG, low affinity III                              |
|                               | 1460218_at   | 2.474 | <i>Cd52</i>      | CD52 antigen                                                    |
|                               | 1448617_at   | 2.461 | <i>Cd53</i>      | CD53 antigen                                                    |
|                               | 1460255_at   | 2.243 | <i>Tnfsf13b</i>  | tumor necrosis factor (ligand) superfamily,<br>member 13b       |

|              |       |                 |                                                         |
|--------------|-------|-----------------|---------------------------------------------------------|
| 1453196_a_at | 2.184 | <i>Oasl2</i>    | 2'-5' oligoadenylate synthetase-like 2                  |
| 1448575_at   | 2.176 | <i>Il7r</i>     | interleukin 7 receptor                                  |
| 1449009_at   | 2.158 | <i>Tgtp</i>     | T-cell specific GTPase                                  |
| 1427301_at   | 2.144 | <i>Cd48</i>     | CD48 antigen                                            |
| 1417268_at   | 2.008 | <i>Cd14</i>     | CD14 antigen                                            |
| 1417756_a_at | 1.939 | <i>Lsp1</i>     | lymphocyte specific 1                                   |
| 1420699_at   | 1.918 | <i>Clec7a</i>   | C-type lectin domain family 7, member a                 |
| 1455656_at   | 1.883 | <i>Btla</i>     | B and T lymphocyte associated                           |
| 1428538_s_at | 1.811 | <i>Rarres2</i>  | Retinoic acid receptor responder (tazarotene induced) 2 |
| 1434380_at   | 1.784 | <i>9830147J</i> | RIKEN cDNA 9830147J24 gene                              |
|              |       | <i>24Rik</i>    | (9830147J24Rik), mRNA                                   |
| 1452519_a_at | 1.633 | <i>Zfp36</i>    | zinc finger protein 36                                  |
| 1453304_s_at | 1.544 | <i>Ly6e</i>     | lymphocyte antigen 6 complex, locus E                   |
| 1439328_at   | 1.553 | <i>Nfat5</i>    | Nuclear factor of activated T-cells 5                   |
| 1450702_at   | 0.648 | <i>Hfe</i>      | Hemochromatosis                                         |
| 1425925_at   | 0.566 | <i>Fcamr</i>    | Fc receptor, IgA, IgM, high affinity                    |
| 1424673_at   | 0.377 | <i>Clec2h</i>   | C-type lectin domain family 2, member h                 |
| 1451924_a_at | 1.81  | <i>Edn1</i>     | endothelin 1                                            |

***Interferon-***

***related genes***

|              |       |              |                                        |
|--------------|-------|--------------|----------------------------------------|
| 1419043_a_at | 2.426 | <i>Iigp1</i> | interferon inducible GTPase 1          |
| 1418240_at   | 2.024 | <i>Gbp2</i>  | Guanylate nucleotide binding protein 2 |
| 1417292_at   | 1.716 | <i>Ifi47</i> | interferon gamma inducible protein 47  |

|              |       |                                     |                                                                                |
|--------------|-------|-------------------------------------|--------------------------------------------------------------------------------|
| 1451567_a_at | 1.597 | <i>Ifi203</i> ;<br><i>LOC547362</i> | interferon activated gene 203 ;<br>similar to interferon-inducible protein 203 |
| 1448452_at   | 1.583 | <i>Irf8</i>                         | interferon regulatory factor 8                                                 |
| 1421916_at   | 1.725 | <i>Pdgfra</i>                       | Platelet derived growth factor receptor,<br>alpha polypeptide                  |
| 1454159_a_at | 4.318 | <i>Igfbp2</i>                       | insulin-like growth factor binding protein 2                                   |

### ***Growth factors***

|              |       |               |                                                  |
|--------------|-------|---------------|--------------------------------------------------|
| 1417065_at   | 4.534 | <i>Egr1</i>   | early growth response 1                          |
| 1426858_at   | 4.373 | <i>Inhbb</i>  | inhibin beta-B                                   |
| 1427682_a_at | 4.38  | <i>Egr2</i>   | early growth response 2                          |
| 1415871_at   | 2.957 | <i>Tgfb1</i>  | transforming growth factor, beta induced         |
| 1416953_at   | 2.528 | <i>Ctgf</i>   | connective tissue growth factor                  |
| 1416039_x_at | 1.972 | <i>Cyr61</i>  | cysteine rich protein 61                         |
| 1440041_at   | 1.962 | <i>Tgfr3</i>  | Transforming growth factor, beta receptor<br>III |
| 1420653_at   | 1.515 | <i>Tgfb1</i>  | transforming growth factor, beta 1               |
| 1454159_a_at | 4.318 | <i>Igfbp2</i> | insulin-like growth factor binding protein 2     |
| 1418918_at   | 0.55  | <i>Igfbp1</i> | insulin-like growth factor binding protein 1     |

### ***Lysosome***

|              |       |               |                                                 |
|--------------|-------|---------------|-------------------------------------------------|
| 1439426_x_at | 6.744 | <i>Lzp-s</i>  | P lysozyme structural                           |
| 1423547_at   | 5.334 | <i>Lyzs</i>   | Lysozyme                                        |
| 1436905_x_at | 2.829 | <i>Laptm5</i> | lysosomal-associated protein<br>transmembrane 5 |

***Macrophage***

***activation***      1425519\_a\_at      2.438      *Ii*      Ia-associated invariant chain

***Proteasome***

1450696\_at      1.548      *Psmb9*      proteasome (prosome, macropain) subunit,  
beta type 9

1422962\_a\_at      1.832      *Psmb8*      proteasome (prosome, macropain) subunit,  
beta type 8

***Inhibitors of***

***the immune***

***response***

1426858\_at      4.373      *Inhbb*      inhibin beta-B

1425519\_a\_at      2.438      *Ii*      Ia-associated invariant chain

1455656\_at      1.883      *Btla*      B and T lymphocyte associated

1452519\_a\_at      1.633      *Zfp36*      zinc finger protein 36

***Adhesion***

***factors***

1415989\_at      2.866      *Vcam1*      vascular cell adhesion molecule 1

1450678\_at      2.116      *Itgb2*      Integrin beta 2

1426301\_at      1.673      *Alcam*      Activated leukocyte cell adhesion molecule

1450663\_at      1.834      *Thbs2*      thrombospondin 2

1449528\_at      1.826      *Figf*      c-fos induced growth factor

1448303\_at      1.823      *Gpnmb*      glycoprotein (transmembrane) nmb

1416066\_at      1.506      *Cd9*      CD9 antigen

***Angiogenesis***

1416953\_at      2.528      *Ctgf*      connective tissue growth factor

|              |       |               |                                                                       |
|--------------|-------|---------------|-----------------------------------------------------------------------|
| 1456746_a_at | 2.072 | <i>Cd99l2</i> | Cd99 antigen-like 2                                                   |
| 1449110_at   | 2.051 | <i>Rhob</i>   | ras homolog gene family, member B                                     |
| 1449528_at   | 1.826 | <i>Figf</i>   | c-fos induced growth factor                                           |
| 1423571_at   | 1.606 | <i>Edg1</i>   | endothelial differentiation sphingolipid G-protein-coupled receptor 1 |

4 Table S2. *Gene ontology analysis of genes significantly regulated in WT mice after*  
 5 *angiotensin II treatment.*

| Category                                   | Total | %     | p-Value  |
|--------------------------------------------|-------|-------|----------|
| GO:7582: physiological process             | 499   | 93.45 | 0.000256 |
| GO:50875: cellular physiological process   | 460   | 86.14 | 0.0244   |
| GO:8152: metabolism                        | 359   | 67.23 | 0.0137   |
| GO:51179: localization                     | 155   | 29.03 | 0.0432   |
| GO:51234: establishment of localization    | 154   | 28.84 | 0.0386   |
| GO:6810: transport                         | 140   | 26.22 | 0.0486   |
| GO:9058: biosynthesis                      | 80    | 14.98 | 0.000265 |
| GO:6629: lipid metabolism                  | 48    | 8.989 | 6.86E-06 |
| GO:44255: cellular lipid metabolism        | 45    | 8.427 | 7.68E-07 |
| GO:6811: ion transport                     | 42    | 7.865 | 0.0209   |
| GO:5975: carbohydrate metabolism           | 32    | 5.993 | 0.000692 |
| GO:8610: lipid biosynthesis                | 29    | 5.431 | 5.06E-07 |
| GO:9628: response to abiotic stimulus      | 25    | 4.682 | 0.00747  |
| GO:6066: alcohol metabolism                | 23    | 4.307 | 0.000233 |
| GO:44262: cellular carbohydrate metabolism | 21    | 3.933 | 0.0172   |
| GO:8202: steroid metabolism                | 18    | 3.371 | 1.76E-05 |
| GO:6457: protein folding                   | 17    | 3.184 | 0.0327   |
| GO:51186: cofactor metabolism              | 17    | 3.184 | 0.0115   |
| GO:6732: coenzyme metabolism               | 15    | 2.809 | 0.0131   |

|                                                                 |    |       |          |
|-----------------------------------------------------------------|----|-------|----------|
| GO:6820: anion transport                                        | 15 | 2.809 | 0.0128   |
| GO:6897: endocytosis                                            | 15 | 2.809 | 0.0192   |
| GO:15980: energy derivation by oxidation of organic compounds   | 14 | 2.622 | 0.00611  |
| GO:6694: steroid biosynthesis                                   | 13 | 2.434 | 6.99E-06 |
| GO:6461: protein complex assembly                               | 13 | 2.434 | 0.026    |
| GO:6631: fatty acid metabolism                                  | 12 | 2.247 | 0.0306   |
| GO:45786: negative regulation of progression through cell cycle | 12 | 2.247 | 0.00949  |
| GO:15698: inorganic anion transport                             | 12 | 2.247 | 0.0466   |
| GO:9100: glycoprotein metabolism                                | 11 | 2.06  | 0.0239   |
| GO:6333: chromatin assembly or disassembly                      | 11 | 2.06  | 0.0291   |
| GO:16125: sterol metabolism                                     | 11 | 2.06  | 0.000131 |
| GO:50801: ion homeostasis                                       | 11 | 2.06  | 0.0133   |
| GO:9101: glycoprotein biosynthesis                              | 10 | 1.873 | 0.0257   |
| GO:6486: protein amino acid glycosylation                       | 10 | 1.873 | 0.0147   |
| GO:6092: main pathways of carbohydrate metabolism               | 10 | 1.873 | 0.025    |
| GO:43413: biopolymer glycosylation                              | 10 | 1.873 | 0.0188   |
| GO:8203: cholesterol metabolism                                 | 10 | 1.873 | 0.000257 |
| GO:6575: amino acid derivative metabolism                       | 10 | 1.873 | 0.000761 |
| GO:6576: biogenic amine metabolism                              | 9  | 1.685 | 0.000578 |
| GO:16126: sterol biosynthesis                                   | 9  | 1.685 | 4.77E-06 |
| GO:6334: nucleosome assembly                                    | 9  | 1.685 | 0.0027   |



|                                                        |   |       |          |
|--------------------------------------------------------|---|-------|----------|
| GO:31497: chromatin assembly                           | 9 | 1.685 | 0.0077   |
| GO:6814: sodium ion transport                          | 9 | 1.685 | 0.0156   |
| GO:6695: cholesterol biosynthesis                      | 8 | 1.498 | 9.35E-06 |
| GO:30003: cation homeostasis                           | 8 | 1.498 | 0.0497   |
| GO:6875: metal ion homeostasis                         | 8 | 1.498 | 0.0297   |
| GO:30005: di-, tri-valent inorganic cation homeostasis | 8 | 1.498 | 0.0214   |
| GO:41: transition metal ion transport                  | 8 | 1.498 | 0.000422 |
| GO:6826: iron ion transport                            | 8 | 1.498 | 3.29E-06 |
| GO:6986: response to unfolded protein                  | 8 | 1.498 | 0.00667  |
| GO:6766: vitamin metabolism                            | 7 | 1.311 | 0.0153   |
| GO:6720: isoprenoid metabolism                         | 7 | 1.311 | 1.43E-05 |
| GO:9408: response to heat                              | 7 | 1.311 | 0.000123 |
| GO:9266: response to temperature stimulus              | 7 | 1.311 | 0.000425 |
| GO:8299: isoprenoid biosynthesis                       | 6 | 1.124 | 1.79E-05 |
| GO:42398: amino acid derivative biosynthesis           | 6 | 1.124 | 0.000302 |
| GO:6084: acetyl-CoA metabolism                         | 6 | 1.124 | 0.0156   |
| GO:46916: transition metal ion homeostasis             | 6 | 1.124 | 0.000877 |
| GO:6879: iron ion homeostasis                          | 6 | 1.124 | 0.000107 |
| GO:6825: copper ion transport                          | 6 | 1.124 | 1.40E-05 |
| GO:42401: biogenic amine biosynthesis                  | 5 | 0.936 | 0.00097  |
| GO:6471: protein amino acid ADP-ribosylation           | 5 | 0.936 | 0.0193   |
| GO:19751: polyol metabolism                            | 5 | 0.936 | 0.000736 |

|                                                     |   |       |          |
|-----------------------------------------------------|---|-------|----------|
| GO:6071: glycerol metabolism                        | 5 | 0.936 | 0.000736 |
| GO:6767: water-soluble vitamin metabolism           | 5 | 0.936 | 0.0437   |
| GO:6919: caspase activation                         | 5 | 0.936 | 0.0204   |
| GO:6956: complement activation                      | 5 | 0.936 | 0.0163   |
| GO:6958: complement activation, classical pathway   | 5 | 0.936 | 0.00443  |
| GO:45087: innate immune response                    | 5 | 0.936 | 0.0368   |
| GO:51345: positive regulation of hydrolase activity | 5 | 0.936 | 0.0215   |
| GO:43280: positive regulation of caspase activity   | 5 | 0.936 | 0.0215   |
| GO:43281: regulation of caspase activity            | 5 | 0.936 | 0.0215   |
| GO:9314: response to radiation                      | 5 | 0.936 | 0.0419   |
| GO:6595: polyamine metabolism                       | 4 | 0.749 | 0.00462  |
| GO:6596: polyamine biosynthesis                     | 4 | 0.749 | 6.88E-05 |
| GO:46364: monosaccharide biosynthesis               | 4 | 0.749 | 0.0213   |
| GO:19319: hexose biosynthesis                       | 4 | 0.749 | 0.0213   |
| GO:6094: gluconeogenesis                            | 4 | 0.749 | 0.0105   |
| GO:46165: alcohol biosynthesis                      | 4 | 0.749 | 0.0213   |
| GO:6090: pyruvate metabolism                        | 4 | 0.749 | 0.0199   |
| GO:8635: caspase activation via cytochrome c        | 4 | 0.749 | 0.000144 |
| GO:8272: sulfate transport                          | 4 | 0.749 | 0.00105  |
| GO:15669: gas transport                             | 4 | 0.749 | 0.0041   |
| GO:15671: oxygen transport                          | 4 | 0.749 | 0.0041   |

8

9 Table S3. Five top-scoring genetic networks in WT mouse kidneys caused by Ang II

10 infusion.

| N  | Genes in Networks                                                                                                                                                                                                                                                                                                                                                                                                                                                                                                                                      | Score | Functions                                                                                         |
|----|--------------------------------------------------------------------------------------------------------------------------------------------------------------------------------------------------------------------------------------------------------------------------------------------------------------------------------------------------------------------------------------------------------------------------------------------------------------------------------------------------------------------------------------------------------|-------|---------------------------------------------------------------------------------------------------|
| 1. | <p>↓<i>ABLIM1</i>, ↓<i>ANPEP</i>, ↓<i>C6orf108</i>, Calpain, ↓<i>CAPZA1</i>, ↓<i>CKS2</i>,<br/> Cofilin, ↓<i>ESPN</i>, F actin, ↓<i>GAS2</i>, HMG CoA synthetase,<br/> ↓<i>HMGCS1</i>, ↑<i>HMGCS2</i>, ↓<i>HNRNPU</i>, ↑<i>LHX1</i>, ↓<i>LIMS1</i>,<br/> ↓<i>MFAP1</i>, ↑<i>MYC</i>, ↓<i>NDN</i>, ↑<i>NDRG1</i>, ↑<i>NPM1</i>, ↓<i>PFN2</i>, ↑<i>PURA</i>,<br/> ↓<i>RBL1</i>, Rock, ↓<i>RRM2B</i>, ↓<i>SFRP1</i>, ↑<i>SFXN1</i>, ↓<i>SLC25A19</i>, ↓<i>TDG</i>,<br/> ↓<i>TGTP</i>, ↑<i>TNS1</i>, ↓<i>WASL</i>, ↓<i>YME1L1</i>, ↑<i>ZBTB16</i></p>      | 46    | Gene<br>expression,<br>cancer, tumor<br>morphology                                                |
| 2. | <p>Adaptor protein2, ↑<i>AP2A2</i>, ↑<i>APOH</i>, Arf, ↑<i>ARFGEF1</i>, ↑<i>C3</i>,<br/> ↓<i>C1R</i>, ↓<i>CCKAR</i>, ↓<i>CGREF1</i>, Ck2, Clathrin, ↓<i>CSNK2A1</i>,<br/> ↓<i>CXCL16</i>, ↑<i>DAB2</i>, ↓<i>DBP</i>, ↓<i>EHD1</i>, ↓<i>FAM46A</i>, ↓<i>GBF1</i>,<br/> ↓<i>HUS1*</i>, ↓<i>IFI16</i>, IgG, Igm, ↓<i>KIF5B</i>, ↑<i>MTSSI</i>, ↓<i>MYCBP</i>, NFkB<br/> (complex), ↓<i>NKIRAS1</i>, ↓<i>PDAP1</i>, PPARA-RXRa, ↓<i>RFC1</i>,<br/> ↓<i>RPA3</i>, ↓<i>SERPINE2</i>, ↓<i>ST8SIA1</i>, ↓<i>TFPI2</i>, ↓<i>TFRC</i></p>                        | 38    | Infectious<br>disease,<br>nervous system<br>development<br>and function,<br>tissue<br>development |
| 3. | <p>↓<i>AES</i>, ↓<i>ATRX</i>, Cbp/p300, ↓<i>CCNC</i>, ↑<i>CDKN1A</i>, ↓<i>CROP</i>,<br/> ↓<i>CYB56I</i>, Cyclin B, ↓<i>CYCS</i>, Cytochrome c, <i>DUB</i>, IFN Beta,<br/> ↓<i>IL6ST</i>, ↑<i>ING1</i>, Interferon alpha, ↓<i>IRF5</i>, ↓<i>LATS2</i>, ↓<i>LGALS3BP</i>,<br/> ↓<i>LY6E</i>, ↓<i>MED14</i>, MHC Class I, ↓<i>PPIG</i>, Proteasome, ↓<i>RB1CC1</i>,<br/> RNA polymerase II, ↑<i>SLC16A6</i>, ↓<i>SLC9A8</i>, ↓<i>SMC4</i>, ↓<i>SRR</i>,<br/> ↓<i>STAT1</i>, ↓<i>TRIM44</i>, ↓<i>UCHL5</i>, ↓<i>USP7</i>, ↓<i>USP18</i>, ↑<i>USP40</i></p> |       | Gene<br>expression, cell<br>cycle, cancer                                                         |

|    |                                                                                                                                                                                                                                                                                                                                                                                                                                                                                                                                              |    |                                                                                                        |
|----|----------------------------------------------------------------------------------------------------------------------------------------------------------------------------------------------------------------------------------------------------------------------------------------------------------------------------------------------------------------------------------------------------------------------------------------------------------------------------------------------------------------------------------------------|----|--------------------------------------------------------------------------------------------------------|
| 4. | <p>↑<i>ACSL1</i>, ↓<i>AIPOR2</i>, ↓<i>AKAP9</i>, Ap1, ↓<i>AQP3</i>, ↓<i>CALM1</i>,<br/> Calmodulin, ↓<i>CLDN1</i>, Creb, ↓<i>DHCR7</i>, ↑<i>DHRS3</i>, ERK1/2,<br/> ↓<i>FABP3</i>, FSH, ↑<i>GAS5</i>, hCG, ↓<i>HIST3H3</i>, Histone h3, IL12,<br/> ↑<i>INHBB</i>, Insulin, ↓<i>MAPRE2</i>, ↓<i>MLL3</i>, ↓<i>MTUS1</i>, ↑<i>NFKBIA</i>,<br/> ↓<i>PCTKI</i>, Pka, ↓<i>PLAC8</i>, PLC, Ras homolog, ↓<i>SLC5A2</i>, ↓<i>SOD2</i>,<br/> ↓<i>SRD5A1</i>, ↓<i>TRIM13</i>, ↓<i>UBE2V2</i></p>                                                      | 30 | <p>Inflammatory<br/> response,<br/> carbohydrate<br/> metabolism,<br/> drug<br/> metabolism</p>        |
| 5. | <p>↓<i>A130040M12RIK</i>, c-<i>Src</i>, ↓<i>CHUK</i>, Chuk-Ikbbk-Ikbbkg,<br/> ↓<i>DNAJ1</i>, ↓<i>DNAJB14</i>, ↓<i>DNAJC3</i>, ↓<i>DNAJC6</i>, ↑<i>DNAJC7</i>,<br/> ENaC, ↓<i>HMGB2</i>, Hsp27, Hsp70, Hsp90, Hsp22/Hsp40/Hsp90,<br/> ↓<i>HSP90AA1</i>, ↓<i>HSPA4</i>, ↓<i>HSPA8</i>, Ikb, IKK, ↓<i>KPNA2</i>,<br/> ↓<i>MAGEH1</i>, ↓<i>MAP3K7</i>, ↓<i>MEF2C</i>, NF-kappaB (family),<br/> ↓<i>NUTF2</i>, P38 MAPK, ↑<i>SCNN1A</i>, ↓<i>SERPINH1</i>, ↑<i>SGK1</i>, ↓<i>SMC6</i>,<br/> ↓<i>TNFSF10</i>, Trypsin, Ubiquitin, ↓<i>WNK1</i></p> | 29 | <p>Post-<br/> translational<br/> modification,<br/> protein folding,<br/> molecular<br/> transport</p> |

11  
12  
13  
14

15 Table S4. *Gene ontology analysis of genes significantly regulated in KO mice after*  
 16 *angiotensin II treatment*

| Category                                               | Total | %     | p-Value |
|--------------------------------------------------------|-------|-------|---------|
| GO:8152: metabolism                                    | 118   | 70.66 | 0.0176  |
| GO:7275: development                                   | 41    | 24.55 | 0.0161  |
| GO:43412: biopolymer modification                      | 36    | 21.56 | 0.0467  |
| GO:48513: organ development                            | 20    | 11.98 | 0.0378  |
| GO:48523: negative regulation of cellular process      | 17    | 10.18 | 0.03    |
| GO:6950: response to stress                            | 17    | 10.18 | 0.0396  |
| GO:48731: system development                           | 15    | 8.982 | 0.0141  |
| GO:6512: ubiquitin cycle                               | 15    | 8.982 | 0.0408  |
| GO:43118: negative regulation of physiological process | 15    | 8.982 | 0.041   |
| GO:7399: nervous system development                    | 14    | 8.383 | 0.0191  |
| GO:9607: response to biotic stimulus                   | 14    | 8.383 | 0.0369  |
| GO:6955: immune response                               | 13    | 7.784 | 0.0185  |
| GO:9605: response to external stimulus                 | 13    | 7.784 | 0.0135  |
| GO:902: cellular morphogenesis                         | 11    | 6.587 | 0.0401  |
| GO:16567: protein ubiquitination                       | 11    | 6.587 | 0.0116  |
| GO:7610: behavior                                      | 11    | 6.587 | 0.0244  |
| GO:6928: cell motility                                 | 10    | 5.988 | 0.00699 |
| GO:51674: localization of cell                         | 10    | 5.988 | 0.00699 |
| GO:7626: locomotory behavior                           | 10    | 5.988 | 0.0165  |

|                                                                   |    |       |         |
|-------------------------------------------------------------------|----|-------|---------|
| GO:40011: locomotion                                              | 10 | 5.988 | 0.00784 |
| GO:16477: cell migration                                          | 9  | 5.389 | 0.00617 |
| GO:9611: response to wounding                                     | 9  | 5.389 | 0.00658 |
| GO:30029: actin filament-based process                            | 6  | 3.593 | 0.044   |
| GO:30036: actin cytoskeleton organization and biogenesis          | 6  | 3.593 | 0.0359  |
| GO:7409: axonogenesis                                             | 5  | 2.994 | 0.0415  |
| GO:7411: axon guidance                                            | 5  | 2.994 | 0.00543 |
| GO:6954: inflammatory response                                    | 5  | 2.994 | 0.0329  |
| GO:15674: di-, tri-valent inorganic cation transport              | 5  | 2.994 | 0.0477  |
| GO:16055: Wnt receptor signaling pathway                          | 5  | 2.994 | 0.021   |
| GO:9880: embryonic pattern specification                          | 4  | 2.395 | 0.00192 |
| GO:8285: negative regulation of cell proliferation                | 4  | 2.395 | 0.0347  |
| GO:30333: antigen processing                                      | 4  | 2.395 | 0.00221 |
| GO:41: transition metal ion transport                             | 4  | 2.395 | 0.00242 |
| GO:8045: motor axon guidance                                      | 3  | 1.796 | 0.00017 |
| GO:45596: negative regulation of cell differentiation             | 3  | 1.796 | 0.0282  |
| GO:30902: hindbrain development                                   | 3  | 1.796 | 0.00104 |
| GO:51093: negative regulation of development                      | 3  | 1.796 | 0.0486  |
| GO:6749: glutathione metabolism                                   | 3  | 1.796 | 0.00139 |
| GO:51241: negative regulation of organismal physiological process | 3  | 1.796 | 0.0103  |
| GO:50777: negative regulation of immune response                  | 3  | 1.796 | 0.00687 |

|                                                                     |   |       |         |
|---------------------------------------------------------------------|---|-------|---------|
| GO:19882: antigen presentation                                      | 3 | 1.796 | 0.0275  |
|                                                                     |   |       | 0.00066 |
| GO:6825: copper ion transport                                       | 3 | 1.796 | 7       |
| GO:6826: iron ion transport                                         | 3 | 1.796 | 0.00305 |
| GO:7179: transforming growth factor beta receptor signaling pathway | 3 | 1.796 | 0.0437  |
| GO:7265: Ras protein signal transduction                            | 3 | 1.796 | 0.0142  |
| GO:35116: embryonic hindlimb morphogenesis                          | 2 | 1.198 | 0.00831 |
| GO:35136: forelimb morphogenesis                                    | 2 | 1.198 | 0.00603 |
| GO:35137: hindlimb morphogenesis                                    | 2 | 1.198 | 0.00914 |
| GO:30901: midbrain development                                      | 2 | 1.198 | 0.00251 |
| GO:46209: nitric oxide metabolism                                   | 2 | 1.198 | 0.0171  |
| GO:6809: nitric oxide biosynthesis                                  | 2 | 1.198 | 0.0171  |
| GO:6004: fucose metabolism                                          | 2 | 1.198 | 0.00534 |
| GO:7182: common-partner SMAD protein phosphorylation                | 2 | 1.198 | 0.0149  |
| GO:46839: phospholipid dephosphorylation                            | 2 | 1.198 | 0.0298  |
| GO:50727: regulation of inflammatory response                       | 2 | 1.198 | 0.0468  |
| GO:19883: antigen presentation, endogenous antigen                  | 2 | 1.198 | 0.0312  |
| GO:19885: antigen processing, endogenous antigen via MHC class I    | 2 | 1.198 | 0.0298  |
| GO:1755: neural crest cell migration                                | 2 | 1.198 | 0.0182  |
| GO:7183: SMAD protein heteromerization                              | 2 | 1.198 | 0.00352 |

|                                                                   |   |       |        |
|-------------------------------------------------------------------|---|-------|--------|
| GO:30509: BMP signaling pathway                                   | 2 | 1.198 | 0.0468 |
| GO:46578: regulation of Ras protein signal transduction           | 2 | 1.198 | 0.0119 |
| GO:51056: regulation of small GTPase mediated signal transduction | 2 | 1.198 | 0.027  |

---



18 Table S5. Five top-scoring genetic networks in KO kidneys caused by angiotensin II  
 19 infusion  
 20

| N  | Genes in Networks                                                                                                                                                                                                                                                                                                                                                                                                                                                                                                                                | Score | Functions                                                     |
|----|--------------------------------------------------------------------------------------------------------------------------------------------------------------------------------------------------------------------------------------------------------------------------------------------------------------------------------------------------------------------------------------------------------------------------------------------------------------------------------------------------------------------------------------------------|-------|---------------------------------------------------------------|
| 1. | <p>↓<i>ADRBK2</i>, Akt, Calmodulin, Calpain, ↓<i>CD44</i>, ↓<i>CDKN1B</i>,<br/>           ↓<i>CHRNA4</i>, Ck2, ↓<i>CTCF</i>, ↓<i>EIF2C2</i>, F Actin, Fibrinogen,<br/>           ↓<i>FZD4</i>, hCG, ↓<i>HNRNPU</i>, Hsp90, IKK (complex), ↓<i>INHBB</i>,<br/>           ↓<i>IQGAPI1</i>, ↓<i>KLF2</i>, ↓<i>MARCH3</i>, ↓<i>MEF2C</i>, ↓<i>NFKBIA</i>, ↓<i>PDAPI1</i>,<br/>           Pdgf, Pias, ↓<i>PIP4K2A</i>, Pkc(s), PLC, ↓<i>PLCB4</i>, ↓<i>RGS2</i>,<br/>           ↓<i>TMOD3</i>, ↓<i>TOPORS</i>, ↓<i>USP8</i>, ↓<i>WASL</i></p>         | 38    | Organ development, cancer, cell death                         |
| 2. | <p>14-3-3, ↓<i>ALCAM</i>, Ap1, ↓<i>CBL</i>, ↓<i>CSNK1E</i>, ↓<i>EPHA4</i>, ERK,<br/>           ↓<i>F2R</i>, Glutathione transferase, GST, ↓<i>GSTA5</i>, ↓<i>GSTM5</i>,<br/>           ↓<i>GSTM6</i>, ↓<i>GSTP</i>, Jnk, ↓<i>KLF6</i>, ↓<i>LRP6</i>, ↓<i>MAP3K1</i>, Mek,<br/>           ↓<i>MGST1</i>, Nfat (family), ↓<i>PLCE1</i>, Rap1, Ras, Ras homolog,<br/>           ↓<i>RHOJ</i>, ↓<i>RPS6KA5</i>, ↓<i>SEC62</i>, ↓<i>SLA</i>, ↓<i>SORBS2</i>, ↓<i>SPSB1</i>,<br/>           ↓<i>TXNIP</i>, VAV, ↓<i>WIPF1</i>, ↓<i>ZC3HAV1</i></p>     | 37    | Drug metabolism, liver hyperbilirubinemia, metabolic disease. |
| 3. | <p>26s Proteasome, ↓<i>AKAP9</i>, ↓<i>ARL5B</i>, ↓<i>ATP2B1</i>, ↓<i>CHKA</i>, ↓<i>CP</i>,<br/>           ↓<i>CUL5</i>, ↓<i>CXCL2</i>, ↓<i>DUSP1</i>, ERK1/2, ↓<i>FLII</i>, FSH, ↓<i>FUNDC2</i>,<br/>           Histone h3, IL1, Insulin, ↑<i>LOC26010</i>, Mapk, P38 MAPK,<br/>           PDGF BB, PI3K, Pka, ↑<i>RAB2A</i>, ↓<i>RAD23B</i>, RNA polymerase II,<br/>           ↓<i>SMAD1</i>, ↓<i>SMC4</i>, ↓<i>SRRM2</i>, Tgf beta, ↓<i>UBE2I</i>, Ubiquitin,<br/>           ↑<i>UGT2B17</i>, ↓<i>ZEB2</i>, ↓<i>ZFP36</i>, ↓<i>ZFP36L1</i></p> | 36    | Cell cycle, RNA damage and repair, gene expression            |
| 4. | <p>ALP, ↑<i>ANXA13</i>, ↓<i>B2M</i>, BCR, ↓<i>CD74</i>, ↓<i>CXCL9</i>, ↓<i>GBP2</i>, GS-</p>                                                                                                                                                                                                                                                                                                                                                                                                                                                     | 34    | Cell-mediated                                                 |

|                                                                                                                                                                                                                                                                                                                                                                                                                                                                                                                                                                  |                                                                                                                        |
|------------------------------------------------------------------------------------------------------------------------------------------------------------------------------------------------------------------------------------------------------------------------------------------------------------------------------------------------------------------------------------------------------------------------------------------------------------------------------------------------------------------------------------------------------------------|------------------------------------------------------------------------------------------------------------------------|
| <p>GCR dimmer, ↓<i>HLA-B</i>, ↓<i>HLA-C</i>, ↓<i>HMGB1L1</i>, ↓<i>IER2</i>, IFN Beta,<br/> Ifn gamma, IgG, IL12 (complex), ↓<i>IL7R</i>, Interferone alpha,<br/> ↓<i>IP6K2</i>, ↓<i>IRF8</i>, LDL, ↓<i>LIMS1</i>, MHC Class I (complex), MHC<br/> CLASS I (family), NFkB (complex), Proteasome, ↓<i>SERPINA1</i>,<br/> ↑<i>ST8SIA1</i>, STAT5a/b, TCR, ↓<i>TLE1</i>, ↑<i>TRMT</i>, ↓<i>TRIM30</i>,<br/> ↓<i>TSC22D3</i>, ↓<i>XAF1</i></p>                                                                                                                        | <p>immune<br/> response,<br/> hematological<br/> system<br/> Development<br/> and function,<br/> tissue</p>            |
| <p>5. ↑<i>AADACL1</i>, amino acids, ↓<i>ARID4A</i>, ↓<i>ATP8A1</i>, ↓<i>CSNK1G1</i>,<br/> EIF5, ↓<i>GALNAC4S-6ST</i>, ↓<i>GATAD2B</i>, <i>GSTM1</i>, <i>HCK</i>, <i>HDAC1</i>,<br/> <i>HDAC1L</i>, ↑<i>HYAL1</i>, ↓<i>JARDIA</i>, <i>LMO2</i>, ↑<i>MTMR7</i>, nitric oxide,<br/> <i>OXSRI</i>, <i>PGDS</i>, ↓<i>PRPF40A</i>, <i>PTPN22</i>, <i>RBI</i>, retinoic acid,<br/> ↓<i>SFRS2IP</i>, ↓<i>SRPK2</i>, <i>STK39</i>, ↓<i>STK17B</i>, <i>STRA13</i>, <i>U2AF2</i>,<br/> <i>VHL</i>, ↓<i>WIPF1</i>, ↓<i>WNK1</i>, <i>WNK4</i>, ↓<i>ZEB2</i>, <i>ZFHX3</i></p> | <p>25 Amino acid<br/> metabolism,<br/> post-translational<br/> modification,<br/> small molecule<br/> biochemistry</p> |

21  
22  
23  
24  
25  
26  
27  
28

29 Table S6. *Functionally-related genes that are differentially expressed in Agtr1a<sup>+/+</sup>*  
 30 *compared Agtr1a<sup>-/-</sup> after 2 days of angiotensin II infusion*

| Functional category               | Affymetrix ID | Fold Change | Gene Symbol    | Description                                                      |
|-----------------------------------|---------------|-------------|----------------|------------------------------------------------------------------|
| <b><i>Sodium transport</i></b>    |               |             |                |                                                                  |
|                                   | 1430804_at    | 2.42        | <i>Slc13a1</i> | solute carrier family 13 (sodium/sulphate symporters). member 1  |
|                                   | 1435009_at    | 0.641       | <i>Slc9a6</i>  | solute carrier family 9 (sodium/hydrogen exchanger). isoform 6   |
|                                   | 1455005_s_at  | 0.622       | <i>Slc5a2</i>  | solute carrier family 5 (sodium/glucose cotransporter). member 2 |
|                                   | 1449878_a_at  | 0.607       | <i>Slc12a6</i> | solute carrier family 12. member 6                               |
|                                   | 1417072_at    | 0.585       | <i>Slc22a6</i> | solute carrier family 22 (organic anion transporter). member 6   |
|                                   | 1419117_at    | 0.499       | <i>Slc22a2</i> | solute carrier family 22 (organic cation transporter). member 2  |
|                                   | 1454865_at    | 0.24        | <i>Slc9a8</i>  | solute carrier family 9 (sodium/hydrogen exchanger). member 8    |
|                                   | 1451460_a_at  | 0.17        | <i>Slc22a7</i> | solute carrier family 22 (organic anion transporter). member 7   |
| <b><i>Potassium transport</i></b> |               |             |                |                                                                  |
|                                   | 1436275_at    | 2.073       | <i>Kcnip2</i>  | KCHIP2A protein splice variant (KCHIP2 gene)                     |

|              |       |                |                                                         |
|--------------|-------|----------------|---------------------------------------------------------|
| 1449878_a_at | 0.607 | <i>Slc12a6</i> | solute carrier family 12. member 6                      |
| 1438578_a_at | 0.596 | <i>Btbdl10</i> | BTB (POZ) domain containing 10                          |
| 1442368_at   | 0.552 | <i>Kctd12b</i> | potassium channel tetramerisation domain containing 12b |
| 1450398_at   | 0.431 | <i>Kcnk5</i>   | potassium channel. subfamily K. member 5                |

***Oxidative -stress***

***related genes***

|              |       |                      |                                                                                       |
|--------------|-------|----------------------|---------------------------------------------------------------------------------------|
| 1452135_at   | 8.246 | <i>Gpx6</i>          | glutathione peroxidase 6                                                              |
| 1448239_at   | 5.501 | <i>Hmox1</i>         | heme oxygenase (decycling) 1                                                          |
| 1421041_s_at | 3.847 | <i>Gsta1 ; Gsta2</i> | glutathione S-transferase. alpha 1 (Ya) ;<br>glutathione S-transferase. alpha 2 (Yc2) |
| 1455393_at   | 3.33  | <i>Cp</i>            | ceruloplasmin                                                                         |
| 1421040_a_at | 3.304 | <i>Gsta2</i>         | glutathione S-transferase. alpha 2 (Yc2)                                              |
| 1415897_a_at | 2.295 | <i>Mgst1</i>         | microsomal glutathione S-transferase 1                                                |
| 1415996_at   | 1.578 | <i>Txnip</i>         | thioredoxin interacting protein                                                       |
| 1448273_at   | 0.631 | <i>Gss</i>           | glutathione synthetase                                                                |

***Immune response***

|              |       |                |                                                  |
|--------------|-------|----------------|--------------------------------------------------|
| 1449195_s_at | 0.648 | <i>Cxcl16</i>  | chemokine (C-X-C motif) ligand 16                |
| 1427165_at   | 0.633 | <i>Il13ra1</i> | interleukin 13 receptor. alpha 1                 |
| 1417185_at   | 0.632 | <i>Ly6a</i>    | lymphocyte antigen 6 complex. locus A            |
| 1428503_a_at | 0.631 | <i>Nkiras1</i> | NFKB inhibitor interacting Ras-like protein<br>1 |
| 1417777_at   | 0.628 | <i>Ltb4dh</i>  | leukotriene B4 12-hydroxydehydrogenase           |
| 1449164_at   | 0.582 | <i>Cd68</i>    | CD68 antigen                                     |

|              |       |                                          |                                                                                     |
|--------------|-------|------------------------------------------|-------------------------------------------------------------------------------------|
| 1422962_a_at | 0.624 | <i>Psmb8</i>                             | proteasome (prosome. macropain) subunit.<br>beta type 8                             |
| 1418240_at   | 0.561 | <i>Gbp2</i>                              | guanylate nucleotide binding protein 2                                              |
| 1451567_a_at | 0.552 | <i>Ifi203 ;</i><br><i>LOC547362</i>      | interferon activated gene 203 ; similar to<br>interferon-inducible protein 203      |
| 1440957_at   | 0.551 | <i>0610030I09Rik</i>                     | RIKEN cDNA 0610030I09 gene                                                          |
| 1451625_a_at | 0.532 | <i>1700013L23Rik</i>                     | RIKEN cDNA 1700013L23 gene                                                          |
| 1417009_at   | 0.524 | <i>C1r</i>                               | complement component 1. r subcomponent                                              |
| 1453304_s_at | 0.491 | <i>Ly6e</i>                              | lymphocyte antigen 6 complex. locus E                                               |
| 1448775_at   | 0.488 | <i>LOC547362</i>                         | similar to interferon-inducible protein 203                                         |
| 1425860_x_at | 0.473 | <i>Cklf</i>                              | chemokine-like factor                                                               |
| 1428012_at   | 0.462 | <i>C8a</i>                               | complement component 8. alpha<br>polypeptide                                        |
| 1437902_s_at | 0.448 | <i>Rarres2</i>                           | retinoic acid receptor responder (tazarotene<br>induced) 2                          |
| 1451114_at   | 0.435 | <i>Cklfsf6</i>                           | chemokine-like factor super family 6                                                |
| 1450883_a_at | 0.404 | <i>Cd36</i>                              | CD36 antigen                                                                        |
| 1422606_at   | 0.362 | <i>C1qtnf3</i>                           | C1q and tumor necrosis factor related<br>protein 3                                  |
| 1460242_at   | 0.291 | <i>Daf1</i>                              | decay accelerating factor 1                                                         |
| 1443889_at   | 0.261 | <i>LOC105892</i>                         | LY antigen-like                                                                     |
| 1421653_a_at | 0.188 | <i>Igh-VJ558 ;</i><br><i>LOC238447 ;</i> | immunoglobulin heavy chain (J558 family)<br>; similar to immunoglobulin heavy chain |

*LOC544903* ; variable region ; similar to immunoglobulin

*LOC544907* mu-chain ; similar to anti-poly(dC)

monoclonal antibody heavy chain

1455577\_at 0.176 *Ccl28* Chemokine (C-C motif) ligand 28 (Ccl28).  
mRNA

### ***Response to DNA***

#### ***damage***

1450569\_a\_at 0.647 *Rbm14* RNA binding motif protein 14

1439487\_at 0.595 *Lig4* ligase IV. DNA. ATP-dependent

1425366\_a\_at 0.573 *Hus1* Hus1 homolog (S. pombe)

### ***Response to***

#### ***unfolded protein***

1423082\_at 0.601 *Der1l* Der1-like domain family. member 1

1424065\_at 0.594 *Edem1* ER degradation enhancer. mannosidase  
alpha-like 1

1422579\_at 0.584 *Hspe1* heat shock protein 1 (chaperonin 10)

1437497\_a\_at 0.483 *Hspca* ; heat shock protein 1. alpha ; similar to heat

*LOC544800* ; shock protein 1. alpha ; similar to Heat

*LOC545508* shock protein HSP 90-alpha (HSP 86)  
(Tumor specific transplantation 86 kDa  
antigen) (TSTA)

1435160\_at 0.465 *1110064P04Rik* RIKEN cDNA 1110064P04 gene

1450843\_a\_at 0.44 *Serpinh1* serine (or cysteine) peptidase inhibitor.  
clade H. member 1

1423566\_a\_at 0.422 *Hsp110* heat shock protein 110

|              |       |               |                                                                  |
|--------------|-------|---------------|------------------------------------------------------------------|
| 1428640_at   | 0.362 | <i>Hsf2bp</i> | heat shock transcription factor 2 binding protein                |
| 1416288_at   | 0.463 | <i>Dnaja1</i> | DnaJ (Hsp40) homolog. subfamily A. member 1                      |
| 1434196_at   | 0.414 | <i>Dnaja4</i> | DnaJ (Hsp40) homolog. subfamily A. member 4                      |
| 1423522_at   | 0.458 | <i>Npm3</i>   | nucleoplasmin 3                                                  |
| 1429502_at   | 0.633 | <i>Stch</i>   | stress 70 protein chaperone. microsome-associated. human homolog |
| 1430718_s_at | 0.628 | <i>Zcs13</i>  | Zinc finger. CSL-type containing 3                               |
| 1424650_at   | 0.600 | <i>Pdia5</i>  | protein disulfide isomerase associated 5                         |
| 1431216_s_at | 0.516 | <i>Dnajc6</i> | DnaJ (Hsp40) homolog. subfamily C. member 6                      |
| 1418591_at   | 0.49  | <i>Dnaja4</i> | DnaJ (Hsp40) homolog. subfamily A. member 4                      |

***Growth related***

***genes***

|              |       |               |                                              |
|--------------|-------|---------------|----------------------------------------------|
| 1418918_at   | 12.25 | <i>Igfbp1</i> | insulin-like growth factor binding protein 1 |
| 1419086_at   | 2.217 | <i>Fgfbp1</i> | fibroblast growth factor binding protein 1   |
| 1426858_at   | 2.009 | <i>Inhbb</i>  | inhibin beta-B                               |
| 1422558_at   | 0.575 | <i>Gamt</i>   | guanidinoacetate methyltransferase           |
| 1460591_at   | 0.491 | <i>Esr1</i>   | estrogen receptor 1 (alpha)                  |
| 1435383_x_at | 0.451 | <i>Ndn</i>    | necdin                                       |
| 1424529_s_at | 0.569 | <i>Cgref1</i> | cell growth regulator with EF hand domain    |

## *Cell cycle*

|              |       |                      |                                                                |
|--------------|-------|----------------------|----------------------------------------------------------------|
| 1451599_at   | 2.376 | <i>Sesn2</i>         | sestrin 2                                                      |
| 1432416_a_at | 1.821 | <i>Npm1</i>          | nucleophosmin 1                                                |
| 1419291_x_at | 2.005 | <i>Gas5</i>          | growth arrest specific 5                                       |
| 1458276_x_at | 1.56  | <i>Cit</i>           | citron                                                         |
| 1435870_at   | 0.654 | <i>Sycp3</i>         | Synaptonemal complex protein 3 (Sycp3).<br>mRNA                |
| 1431746_a_at | 0.651 | <i>Ube1c</i>         | ubiquitin-activating enzyme E1C                                |
| 1460551_at   | 0.65  | <i>Ran</i>           | RAN. member RAS oncogene family                                |
| 1423338_at   | 0.639 | <i>Ccdc16</i>        | coiled-coil domain containing 16                               |
| 1416698_a_at | 0.617 | <i>Cks1b</i>         | CDC28 protein kinase 1b                                        |
| 1448171_at   | 0.605 | <i>Siah2</i>         | seven in absentia 2                                            |
| 1451990_at   | 0.591 | <i>Mapre2</i>        | microtubule-associated protein. RP/EB<br>family. member 2      |
| 1448635_at   | 0.58  | <i>Smc2l1</i>        | SMC2 structural maintenance of<br>chromosomes 2-like 1 (yeast) |
| 1450864_at   | 0.575 | <i>Calm3</i>         | calmodulin 3                                                   |
| 1424982_a_at | 0.562 | <i>2700078E11Rik</i> | RIKEN cDNA 2700078E11 gene                                     |
| 1417458_s_at | 0.559 | <i>Cks2</i>          | CDC28 protein kinase regulatory subunit 2                      |
| 1450112_a_at | 0.555 | <i>Gas2</i>          | growth arrest specific 2                                       |
| 1454144_a_at | 0.532 | <i>Ccnc</i>          | cyclin C                                                       |
| 1460591_at   | 0.491 | <i>Esr1</i>          | estrogen receptor 1 (alpha)                                    |
| 1448424_at   | 0.216 | <i>Frzb</i>          | frizzled-related protein                                       |



### *Apoptosis related*

|              |              |       |                      |                                                          |
|--------------|--------------|-------|----------------------|----------------------------------------------------------|
| <i>genes</i> | 1416041_at   | 1.797 | <i>Sgk</i>           | serum/glucocorticoid regulated kinase                    |
|              | 1431746_a_at | 0.651 | <i>Ube1c</i>         | ubiquitin-activating enzyme E1C                          |
|              | 1421853_at   | 0.643 | <i>Psen1</i>         | presenilin 1                                             |
|              | 1422120_at   | 0.635 | <i>Eaf2</i>          | ELL associated factor 2                                  |
|              | 1454650_at   | 0.635 | <i>Trim35</i>        | tripartite motif-containing 35                           |
|              | 1448528_at   | 0.634 | <i>Pdcd10</i>        | programmed cell death 10                                 |
|              | 1459913_at   | 0.618 | <i>Tnfsf10</i>       | tumor necrosis factor (ligand) superfamily.<br>member 10 |
|              | 1448171_at   | 0.605 | <i>Siah2</i>         | seven in absentia 2                                      |
|              | 1450112_a_at | 0.555 | <i>Gas2</i>          | growth arrest specific 2                                 |
|              | 1451625_a_at | 0.532 | <i>1700013L23Rik</i> | RIKEN cDNA 1700013L23 gene                               |
|              | 1422483_a_at | 0.531 | <i>Cyts</i>          | cytochrome c. somatic                                    |

### *Electron*

|                  |              |       |                               |                                                                                       |
|------------------|--------------|-------|-------------------------------|---------------------------------------------------------------------------------------|
| <i>transport</i> | 1423257_at   | 21.22 | <i>Cyp4a14</i>                | cytochrome P450. family 4. subfamily a.<br>polypeptide 14                             |
|                  | 1424853_s_at | 2.609 | <i>Cyp4a10 ;<br/>BC013476</i> | cytochrome P450. family 4. subfamily a.<br>polypeptide 10 ; cDNA sequence<br>BC013476 |
|                  | 1428296_at   | 0.664 | <i>Polr2l</i>                 | polymerase (RNA) II (DNA directed)<br>polypeptide L                                   |
|                  | 1418117_at   | 0.66  | <i>Ndufs4</i>                 | NADH dehydrogenase (ubiquinone) Fe-S<br>protein 4                                     |

|              |       |                      |                                                                     |
|--------------|-------|----------------------|---------------------------------------------------------------------|
| 1434742_s_at | 0.651 | <i>2810401C16Rik</i> | RIKEN cDNA 2810401C16 gene                                          |
| 1424048_a_at | 0.634 | <i>Cyb5r1</i>        | cytochrome b5 reductase 1                                           |
| 1453206_at   | 0.632 | <i>Acad9</i>         | acyl-Coenzyme A dehydrogenase family.<br>member 9                   |
| 1428124_at   | 0.621 | <i>Gtf2e1</i>        | general transcription factor II E.<br>polypeptide 1 (alpha subunit) |
| 1424650_at   | 0.600 | <i>Pdia5</i>         | protein disulfide isomerase associated 5                            |
| 1419504_at   | 0.587 | <i>Mogat1</i>        | monoacylglycerol O-acyltransferase 1                                |
| 1417507_at   | 0.584 | <i>Cyb561</i>        | cytochrome b-561                                                    |
| 1429443_at   | 0.573 | <i>Cpne4</i>         | copine IV                                                           |
| 1418709_at   | 0.542 | <i>Cox7a1</i>        | cytochrome c oxidase. subunit VIIa 1                                |
| 1422483_a_at | 0.531 | <i>Cycs</i>          | cytochrome c. somatic                                               |
| 1428323_at   | 0.457 | <i>Gpd2</i>          | glycerol phosphate dehydrogenase 2.<br>mitochondrial                |
| 1454918_at   | 0.4   | <i>Agps</i>          | alkylglycerone phosphate synthase                                   |
| 1424352_at   | 0.382 | <i>MGC25972</i>      | similar to cytochrome P450. 4a10                                    |
| 1421709_a_at | 0.301 | <i>Fmo5</i>          | flavin containing monooxygenase 5                                   |
| 1426102_at   | 0.238 | <i>Cyp2j13</i>       | cytochrome P450. family 2. subfamily j.<br>polypeptide 13           |

### ***ATP biosynthesis***

|            |       |                 |                                                                           |
|------------|-------|-----------------|---------------------------------------------------------------------------|
| 1416248_at | 0.666 | <i>Nadk</i>     | NAD kinase                                                                |
| 1448211_at | 0.659 | <i>Atp6v0e2</i> | ATPase. H <sup>+</sup> transporting. lysosomal. V0<br>subunit E isoform 2 |

|            |       |                 |                                                          |
|------------|-------|-----------------|----------------------------------------------------------|
| 1435637_at | 0.649 | <i>D8Wsu49e</i> | DNA segment. Chr 8. Wayne State University 49. expressed |
|------------|-------|-----------------|----------------------------------------------------------|

***Gluconeogenesis***

|            |       |             |                                                                                           |
|------------|-------|-------------|-------------------------------------------------------------------------------------------|
| 1455209_at | 3.914 | <i>Pck1</i> | Phosphoenolpyruvate carboxykinase 1. cytosolic. mRNA (cDNA clone MGC:46881 IMAGE:4973187) |
|------------|-------|-------------|-------------------------------------------------------------------------------------------|

|            |       |             |                                                   |
|------------|-------|-------------|---------------------------------------------------|
| 1428323_at | 0.457 | <i>Gpd2</i> | glycerol phosphate dehydrogenase 2. mitochondrial |
|------------|-------|-------------|---------------------------------------------------|

|            |       |             |                                                   |
|------------|-------|-------------|---------------------------------------------------|
| 1428323_at | 0.457 | <i>Gpd2</i> | glycerol phosphate dehydrogenase 2. mitochondrial |
|------------|-------|-------------|---------------------------------------------------|

***Fatty acid***

***biosynthesis***

|            |       |             |                                         |
|------------|-------|-------------|-----------------------------------------|
| 1448910_at | 0.557 | <i>Pecr</i> | peroxisomal trans-2-enoyl-CoA reductase |
|------------|-------|-------------|-----------------------------------------|

|              |      |               |                                    |
|--------------|------|---------------|------------------------------------|
| 1453550_a_at | 0.45 | <i>Mlstd2</i> | male sterility domain containing 2 |
|--------------|------|---------------|------------------------------------|

|            |       |              |                                                  |
|------------|-------|--------------|--------------------------------------------------|
| 1418668_at | 0.372 | <i>Acsml</i> | acyl-CoA synthetase medium-chain family member 1 |
|------------|-------|--------------|--------------------------------------------------|

|              |       |              |                                                  |
|--------------|-------|--------------|--------------------------------------------------|
| 1425559_a_at | 0.146 | <i>Acsm3</i> | acyl-CoA synthetase medium-chain family member 3 |
|--------------|-------|--------------|--------------------------------------------------|

***Lipid metabolism***

|            |       |              |                                                     |
|------------|-------|--------------|-----------------------------------------------------|
| 1421840_at | 3.568 | <i>Abcal</i> | ATP-binding cassette. sub-family A (ABC1). member 1 |
|------------|-------|--------------|-----------------------------------------------------|

|            |       |              |                                                     |
|------------|-------|--------------|-----------------------------------------------------|
| 1421839_at | 2.936 | <i>Abcal</i> | ATP-binding cassette. sub-family A (ABC1). member 1 |
|------------|-------|--------------|-----------------------------------------------------|

|            |       |             |                                  |
|------------|-------|-------------|----------------------------------|
| 1444487_at | 2.625 | <i>Lrat</i> | Lecithin-retinol acyltransferase |
|------------|-------|-------------|----------------------------------|

|                          |              |       |                |                                                              |
|--------------------------|--------------|-------|----------------|--------------------------------------------------------------|
|                          |              |       |                | (phosphatidylcholine-retinol-O-acyltransferase) (Lrat). Mrna |
|                          | 1437856_at   | 1.631 | <i>Ipmk</i>    | inositol polyphosphate multikinase                           |
| <b><i>Steroid</i></b>    |              |       |                |                                                              |
| <b><i>metabolism</i></b> | 1423858_a_at | 6.838 | <i>Hmgcs2</i>  | 3-hydroxy-3-methylglutaryl-Coenzyme A synthase 2             |
|                          | 1425853_s_at | 3.166 | <i>Prlr</i>    | prolactin receptor                                           |
|                          | 1421839_at   | 2.936 | <i>Abca1</i>   | ATP-binding cassette. sub-family A (ABC1). member 1          |
|                          | 1425387_at   | 1.763 | <i>Akr1c20</i> | aldo-keto reductase family 1. member C20                     |
|                          | 1416222_at   | 0.663 | <i>Nsdhl</i>   | NAD(P) dependent steroid dehydrogenase-like                  |
|                          | 1433443_a_at | 0.658 | <i>Hmgcs1</i>  | 3-hydroxy-3-methylglutaryl-Coenzyme A synthase 1             |
|                          | 1431385_a_at | 0.655 | <i>Mbtps1</i>  | membrane-bound transcription factor peptidase. site 1        |
|                          | 1417303_at   | 0.587 | <i>Mvd</i>     | mevalonate (diphospho) decarboxylase                         |
|                          | 1448619_at   | 0.569 | <i>Dhcr7</i>   | 7-dehydrocholesterol reductase                               |
|                          | 1428356_at   | 0.565 | <i>Osbp2</i>   | oxysterol binding protein 2                                  |
|                          | 1416645_a_at | 0.492 | <i>Afp</i>     | alpha fetoprotein                                            |
|                          | 1422960_at   | 0.466 | <i>Srd5a2</i>  | steroid 5 alpha-reductase 2                                  |
|                          | 1434642_at   | 0.461 | <i>Dhrs8</i>   | dehydrogenase/reductase (SDR family) member 8                |

|                             |              |       |                      |                                                        |
|-----------------------------|--------------|-------|----------------------|--------------------------------------------------------|
|                             | 1419136_at   | 0.411 | <i>Akr1c18</i>       | aldo-keto reductase family 1. member C18               |
|                             | 1451122_at   | 0.289 | <i>Idi1</i>          | isopentenyl-diphosphate delta isomerase                |
| <b><i>Amino acid</i></b>    |              |       |                      |                                                        |
| <b><i>metabolism</i></b>    | 1430570_at   | 5.803 | <i>Kynu</i>          | kynureninase (L-kynurenine hydrolase)                  |
|                             | 1424618_at   | 5.186 | <i>Hpd</i>           | 4-hydroxyphenylpyruvic acid dioxygenase                |
|                             | 1452887_at   | 0.649 | <i>Traf3ip1</i>      | TNF receptor-associated factor 3 interacting protein 1 |
|                             | 1423465_at   | 0.649 | <i>Sdfr2</i>         | stromal cell derived factor receptor 2                 |
|                             | 1423709_s_at | 0.609 | <i>Farslb</i>        | phenylalanine-tRNA synthetase-like. beta subunit       |
|                             | 1416563_at   | 0.595 | <i>Ctps</i>          | cytidine 5'-triphosphate synthase                      |
|                             | 1420425_at   | 0.588 | <i>Prdm1</i>         | PR domain containing 1. with ZNF domain                |
|                             | 1425117_at   | 0.546 | <i>0610012D14Rik</i> | RIKEN cDNA 0610012D14 gene                             |
|                             | 1450871_a_at | 0.203 | <i>Bcat1</i>         | branched chain aminotransferase 1. cytosolic           |
|                             | 1423883_at   | 2.225 | <i>Acs11</i>         | acyl-CoA synthetase long-chain family member 1         |
| <b><i>Regulation of</i></b> |              |       |                      |                                                        |
| <b><i>protein</i></b>       |              |       |                      |                                                        |
| <b><i>metabolism</i></b>    | 1426858_at   | 2.009 | <i>Inhbb</i>         | inhibin beta-B                                         |
|                             | 1452887_at   | 0.649 | <i>Traf3ip1</i>      | TNF receptor-associated factor 3 interacting protein 1 |
|                             | 1455028_at   | 0.628 | <i>Mapt</i>          | microtubule-associated protein tau                     |

|                                                  |              |       |                                                         |                                                                                                                                   |
|--------------------------------------------------|--------------|-------|---------------------------------------------------------|-----------------------------------------------------------------------------------------------------------------------------------|
|                                                  | 1434891_at   | 0.621 | <i>Ptgfrn</i>                                           | prostaglandin F2 receptor negative regulator                                                                                      |
|                                                  | 1424719_a_at | 0.577 | <i>Mapt</i>                                             | microtubule-associated protein tau                                                                                                |
|                                                  | 1426022_a_at | 0.502 | <i>Vill</i>                                             | villin-like                                                                                                                       |
| <b><i>Regulation of protein biosynthesis</i></b> |              |       |                                                         |                                                                                                                                   |
|                                                  | 1426858_at   | 2.009 | <i>Inhbb</i>                                            | inhibin beta-B                                                                                                                    |
|                                                  | 1441955_s_at | 0.667 | <i>Paip1</i>                                            | polyadenylate binding protein-interacting protein 1                                                                               |
|                                                  | 1423220_at   | 0.643 | <i>Eif4e</i>                                            | eukaryotic translation initiation factor 4E                                                                                       |
|                                                  | 1435803_a_at | 0.623 | <i>Eif4e2</i>                                           | eukaryotic translation initiation factor 4E member 2                                                                              |
|                                                  | 1434891_at   | 0.621 | <i>Ptgfrn</i>                                           | prostaglandin F2 receptor negative regulator                                                                                      |
|                                                  | 1438761_a_at | 0.239 | <i>Odc1</i> ;<br><i>LOC545783</i> ;<br><i>LOC546355</i> | ornithine decarboxylase. structural 1 ;<br>similar to Ornithine decarboxylase (ODC) ;<br>similar to Ornithine decarboxylase (ODC) |
| <b><i>Signal transduction</i></b>                |              |       |                                                         |                                                                                                                                   |
|                                                  | 1447669_s_at | 2.135 | <i>Gng4</i>                                             | guanine nucleotide binding protein (G protein). gamma 4 subunit                                                                   |
|                                                  | 1437856_at   | 1.631 | <i>Ipmk</i>                                             | inositol polyphosphate multikinase                                                                                                |
